# Supplementary material
Source: PubMed Central journal article supplement (PMC5992132)
Supplement: mmc1.pdf [file mmc1.pdf]

**The American Journal of Human Genetics, Volume 102**

**Supplemental Data**

**$\beta$ IV Spectrinopathies Cause**

**Profound Intellectual Disability, Congenital Hypotonia,**

**and Motor Axonal Neuropathy**

**Chih-Chuan Wang, Xilma R. Ortiz-González, Sabrina W. Yum, Sara M. Gill, Amy White, Erin Kelter, Laurie H. Seaver, Sansan Lee, Graham Wiley, Patrick M. Gaffney, Klaas J. Wierenga, and Matthew N. Rasband**

Supplemental Fig. 1. Alignment of human pathogenic *SPTBN4* variants with and their equivalent locations in mouse *Sptbn4*.

**Gln605\***

|       |     |                                                               |     |
|-------|-----|---------------------------------------------------------------|-----|
| Human | 599 | LRFSQLQGYQPCDPQVICNRVNHVHGCLAELQEQAARRRAELEASRSLWALLQELEEAEES | 658 |
|       |     | LRFSQLQGYQPCDPQVICNRVNHVHGCL+ELQEQAARRRAELEASRSLWALLQELEEAEES |     |
| Mouse | 600 | LRFSQLQGYQPCDPQVICNRVNHVHGCLSELQEQAARRRAELEASRSLWALLQELEEAEES | 659 |

**Trp903\***

|       |     |                                                              |     |
|-------|-----|--------------------------------------------------------------|-----|
| Human | 899 | EKEQWLLSMRVPDSLDDVEVVQHRFESLDQEMNSLMGRVLDVNHTVQELVEGGHPSSDEV | 958 |
|       |     | EKEQWLL+MRVPDSLDDVEVVQHRFESLDQEMNSLMGRVLDVN TVQELVEGGHPSSDEV |     |
| Mouse | 895 | EKEQWLLAMRVPDSLDDVEVVQHRFESLDQEMNSLMGRVLDVNQTVQELVEGGHPSSDEV | 954 |

**Glu1274\***

|       |      |                                                                |      |
|-------|------|----------------------------------------------------------------|------|
| Human | 1259 | VQAAEGLLRQGN IYGEQAQEAVTRLLEKNQENQLRAQQWMQKLHDQLELQHFRLRDCHELD | 1318 |
|       |      | VQAAE LLRQGN YGEQAQEAV RLLEK+QENQLRAQQWMQKL DQL LQHFLRDCHELD   |      |
| Mouse | 1255 | VQAAESLLRQGNAYGEQAQEAVARLLEKSQENQLRAQQWMQKLLDQLVLQHFRLRDCHELD  | 1314 |

**Gln1277Argfs\*4**

|       |      |                                                                |      |
|-------|------|----------------------------------------------------------------|------|
| Query | 1259 | VQAAEGLLRQGN IYGEQAQEAVTRLLEKNQENQLRAQQWMQKLHDQLELQHFRLRDCHELD | 1318 |
|       |      | VQAAE LLRQGN YGEQAQEAV RLLEK+QENQLRAQQWMQKL DQL LQHFLRDCHELD   |      |
| Sbjct | 1255 | VQAAESLLRQGNAYGEQAQEAVARLLEKSQENQLRAQQWMQKLLDQLVLQHFRLRDCHELD  | 1314 |

**Arg504Gln**

|       |     |                                                                |     |
|-------|-----|----------------------------------------------------------------|-----|
| Human | 479 | AAYEERVQGVAE LAQALAAEGYYDI RRVAQRDSVLRQWALLTGLVGARRTRLEQN LALQ | 538 |
|       |     | AAYEERVQGVAE LAQALAAEGYYD RRVAQRDSVLRQWALLTGLVGARRTRLEQN LALQ  |     |
| Mouse | 480 | AAYEERVQGVAE LAQALAAEGYYDARRVAQRDSVLRQWALLTGLVGARRTRLEQN LALQ  | 539 |

**Arg2435Cys**

|       |      |                                                               |      |
|-------|------|---------------------------------------------------------------|------|
| Human | 2398 | SRSAPAQGG SAPAPPPPTHTVQHEGFLLRKRELDANRKSSNRSWVSLYCVLSK GELGFY | 2457 |
|       |      | SRSAPAQGG SAPAPPPPTHTVQHEGFLLRKRELDANRKSSNRSWVSLYCVLSK GELGFY |      |
| Mouse | 2395 | SRSAPAQGG SAPAPPPPTHTVQHEGFLLRKRELDANRKSSNRSWVSLYCVLSK GELGFY | 2454 |

**Ala2485Leufs\*31**

|       |      |                                                               |      |
|-------|------|---------------------------------------------------------------|------|
| Human | 2458 | KDSKGPASG THGGEPLLSLHKATSEV ASDYKKKKHVFKLQTQDGSEFLLQAKDEEEMNG | 2517 |
|       |      | KDSKGPASG THGGEPLLSLHKATSEV ASDYKKKKHVFKLQTQDGSEFLLQAKDEEEMNG |      |
| Mouse | 2455 | KDSKGPASG THGGEPLLSLHKATSEV ASDYKKKKHVFKLQTQDGSEFLLQAKDEEEMNG | 2514 |
